# Supplementary material for: The Role of Multigene Panel Next-Generation Sequencing Techniques in Managing Patients with Metastatic Colorectal Carcinoma
Source: Preprints.org preprint supplement (doi:10.20944/preprints202405.0432.v1), 2024-05-08
Supplement: Supplementary file 1 [file supplementary]

Supplementary Materials


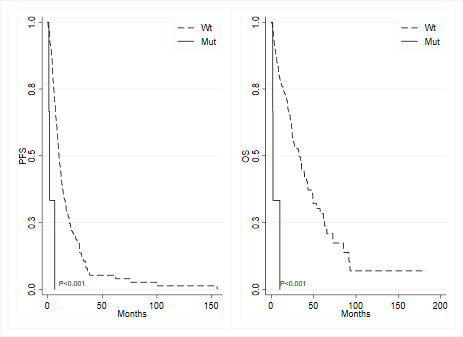


Figure S1 - Kaplan-Meier curves for progression-free survival (left) and overall survival (right) based on the mutational status of *CTNBB1* gene.


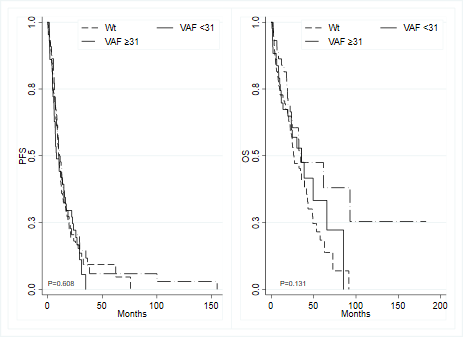


Figure S2 - Kaplan-Meier curves for progression-free survival (left) and overall survival (right) by KRAS mutational status and variant allele frequency (VAF) dichotomized on the median value.


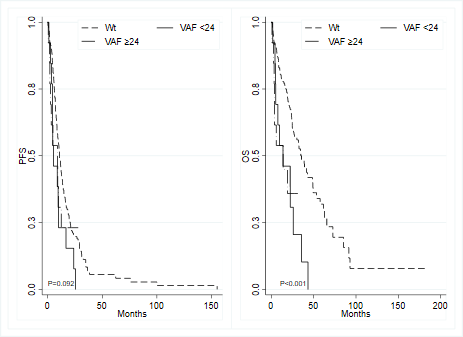


Figure S3 - Kaplan-Meier curves for progression-free survival (left) and overall survival (right) by BRAF mutational status and variant allele frequency (VAF) dichotomized on the median value.


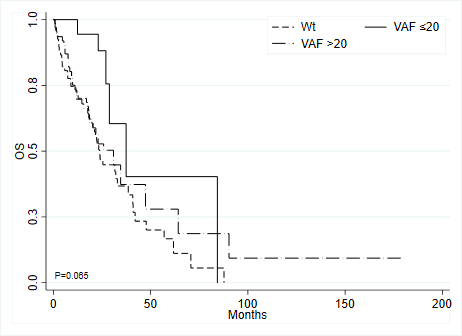


Figure S4 - Kaplan-Meier curves for overall survival (right) by RAS mutational status and variant allele frequency (VAF) >20 vs ≤20
